# Supplementary material for: Effect of integrin α7 on cell proliferation, invasion, apoptosis and the PI3K/AKT pathway, and its association with clinicopathological features in endometrial cancer
Source: PubMed Central journal article supplement — Oncol Lett. 2022 Nov 23;25(1):26. doi: 10.3892/ol.2022.13612 (PMC9713827; doi:10.3892/ol.2022.13612), 2022-11-23

Figure S1. C-caspase 3 after transfection in Ishikawa and RL95-2 cells. (A) Representative images of C-caspase 3 detection by western blot after transfection. (B) Grayscale analyses of blots of C-caspase 3 level after transfection. \* $P < 0.05$  and \*\* $P < 0.01$ . ITGA7, integrin  $\alpha 7$ ; NC, negative control; C-caspase 3, cleaved-caspase 3; GAPDH, glyceraldehyde-3-phosphate dehydrogenase; si-, short interfering; NC, negative control.

A

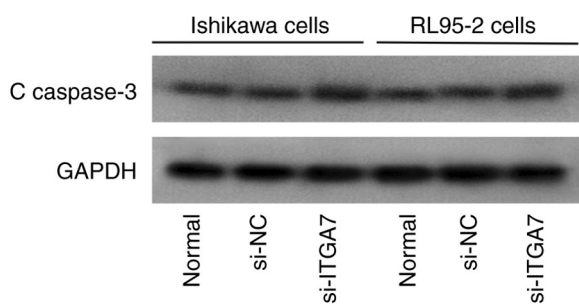

B

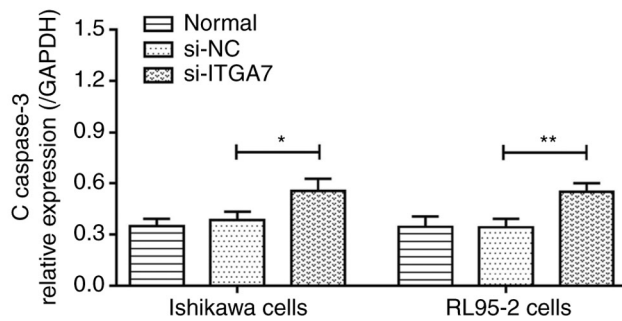

Figure S2. Proliferation, apoptosis and invasion after transfection in THESCs. (A) ITGA7 mRNA level after transfection in THESCs. (B) Representative images of ITGA7 protein level detection by western blot after transfection in THESCs. (C) Grayscale analyses of blots of ITGA7 protein level after transfection in THESCs. (D) Proliferation after transfection in THESCs. (E) TUNEL-positive rate after transfection in THESCs; (F) Invasive cell number after transfection in THESCs. (G) Representative images of TUNEL and invasion assays after transfection in THESCs (magnification, x200). \*\*P<0.01. ITGA7, integrin  $\alpha$ 7; NC, negative control; GAPDH, glyceraldehyde-3-phosphate dehydrogenase; NS, not significant; si, short interfering; OD, optical density.

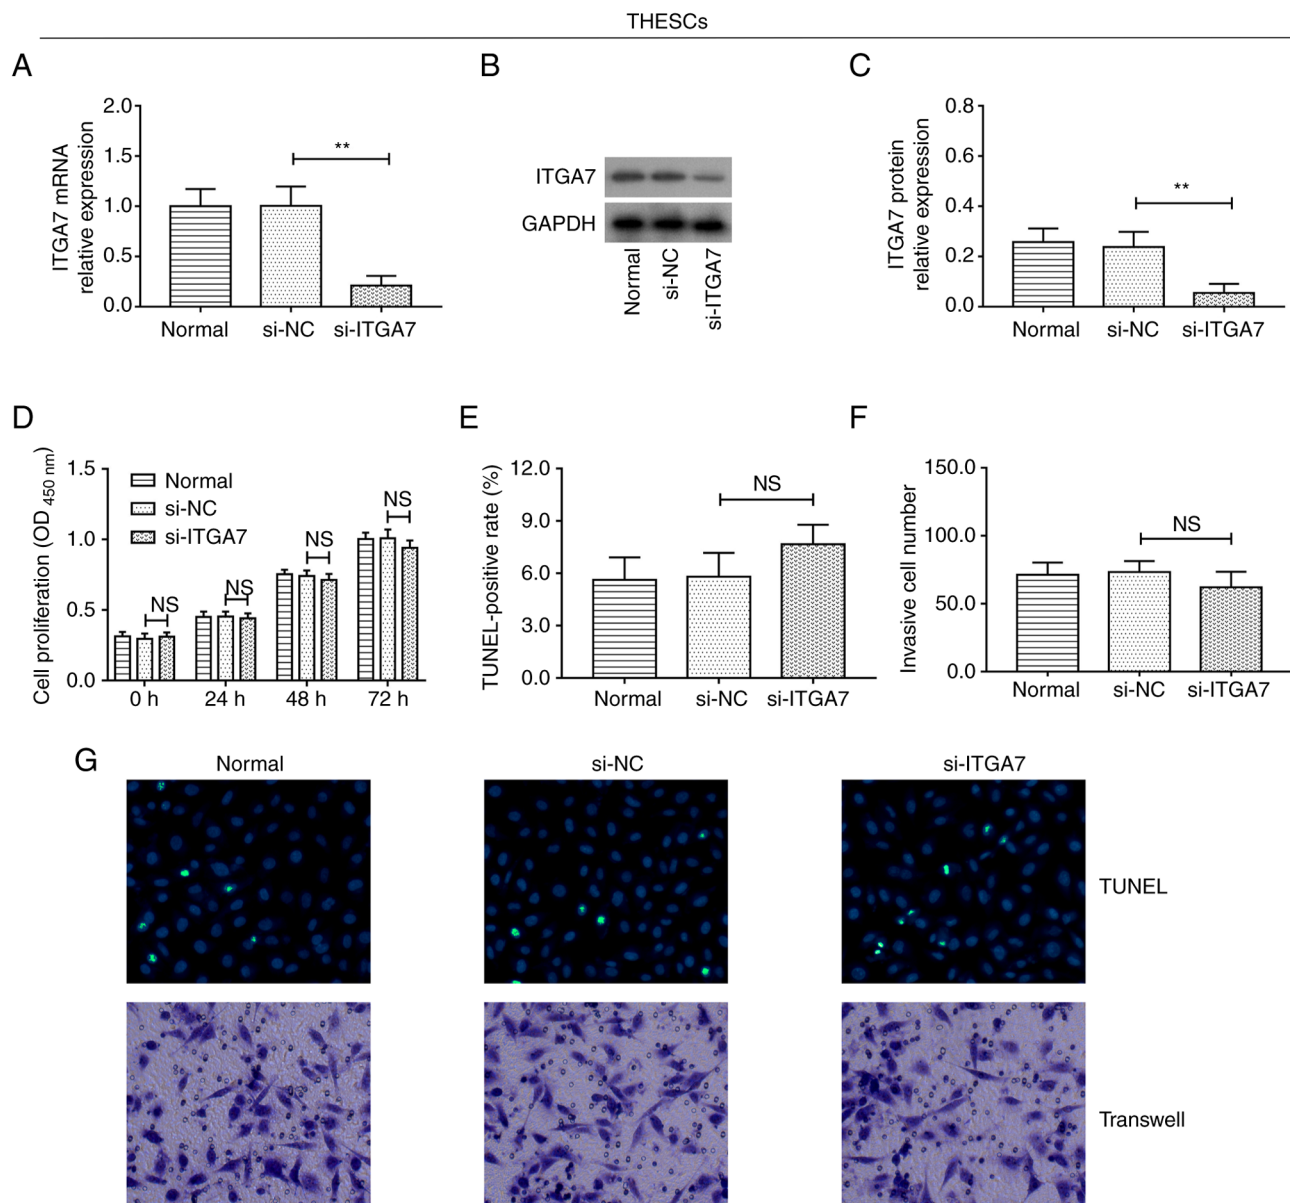

Supplement: Supplementary_Data.pdf [file Supplementary_Data.pdf]
